# Supplementary material
Source: publisher site journal article supplement (http://e-cmh.org/upload/media/cmh-2023-0343-Supplementary-Table-4.pdf)
Supplement: Supplementary file 1 [file cmh-2023-0343-Supplementary-Table-4.pdf]

**Supplementary Table 4.** Liver diseases-associated genes

| AIH-associated genes | PSC-associated genes | MASLD-associated genes | ALC-associated genes | HCC-associated genes |
|----------------------|----------------------|------------------------|----------------------|----------------------|
| RBM45                | MST1                 | TM6SF2                 | TNF                  | CTNNB1               |
| HLA-DRB1             | ABCB4                | PNPLA3                 | CXCL8                | TP53                 |
| TNF                  | UBASH3A              | CYP2E1                 | CCL5                 | AXIN1                |
| CYP2D6               | TCF4                 | SIRT1                  | STS                  | EGF                  |
| CTLA4                | BCL2L11              | FGF21                  | SULT1E1              | PDGFRL               |
| GPT                  | NOS2                 | LEP                    | DDC                  | PIK3CA               |
| SEPSECS              | GPR35                | NFE2L2                 | CSF3                 | TSC1                 |
| IL10                 | HIF1A                | PPARA                  | ALB                  | TSC2                 |
| AMELX                | IL2RA                | ADIPOQ                 | IL22                 | CASP8                |
| IL2RA                | SH2B3                | NR1H4                  | CCL2                 | AFP                  |
| PSC                  | ACAD8                | PPARD                  | TLR4                 | MIR122               |
| ISG20                | MMEL1                | SREBF1                 | PNPLA3               | SLC5A5               |
| FOXP3                | PRKD2                | LDLR                   | FOXO1                | LDHA                 |
| IFNG                 | PUS10                | XBP1                   | SIRT1                | TNF                  |
| VDR                  | RBM45                | CAT                    | IL1A                 | GPC3                 |
| AIRE                 | SIK2                 | FAS                    | CXCR2                | MIR204               |
| HLA-DPB1             | ATXN2                | GNMT                   | IL17A                | MIR33A               |
| IL4                  | PHLDB1               | PEMT                   | ITGB2                | MMP9                 |
| PDCD1                | BSN                  | CPT1A                  | PIK3CA               | ATM                  |
| TPMT                 | RMI2                 | NR5A2                  | PIK3CB               | MEG3                 |
| ENAM                 | HDAC7                | TGFB1                  | PIK3CD               | MIR503               |
| IL2                  | CFTR                 | AHR                    | PIK3CG               | SPP1                 |
| ACTB                 | HLA-DRB1             | GSTM1                  | ACKR3                | TERT                 |
| FTCD                 | KIAA1109             | GSTP1                  | ACTB                 | VEGFA                |
| HLA-A                | MIR4435-2HG          | IL1A                   | CCL4                 | MIR1247              |
| PTPN22               | RIC8B                | JAK2                   | BRCA1                | MIR1307              |
| LGALS3BP             | CD226                | PRKCA                  | SYK                  | TMED7-TICAM2         |
| HPGDS                | GPBAR1               | ABCC2                  | LINC01093            | HOTTIP               |
| HLA-DRB4             | HLA-B                | KLB                    | EBI3                 | LINC-ROR             |
| HLA-DRB3             | MICA                 | ACE                    | CDKN2B               | PCBP2-OT1            |
| HLA-DOA              | FUT2                 | ALDH2                  | UBD                  | YAP1                 |
| HLA-DQB1             | IL2                  | GSTT1                  | MRPL28               | KAT5                 |
| CD28                 | TNF                  | PTEN                   | KHDRBS1              | ZNRD2                |
| IL17A                | PSC                  | CD14                   | MTCO2P12             | DCTN6                |
| LOC107987479         | CCR5                 | NQO1                   | SUB1                 | MTCO2P12             |
| CYP1A2               | DLAT                 | FOLR2                  | H3P9                 | HPSE                 |
| IL1B                 | HLA-DQA1             | GSTA1                  | NOSTRIN              | OGFR                 |
| IL6                  | HLA-DRB3             | IL4                    | TRIM69               | NUDT6                |
| CD274                | MET                  | LIF                    | CSF3R                | CYTOR                |
| TBX21                | IL10                 | PKD4                   | TICAM1               | H3P23                |
| RETN                 | ALB                  | PRKCD                  | CYP7A1               | CCR7                 |

**Supplementary Table 4.** Continued

| AIH-associated genes | PSC-associated genes | MASLD-associated genes | ALC-associated genes | HCC-associated genes |
|----------------------|----------------------|------------------------|----------------------|----------------------|
| FH                   | HLA-C                | PRKCE                  | AGA                  | ADH1C                |
| MIR223               | NR1H4                | VLDLR                  | DNMT1                | CYP2B6               |
| GEM                  | GP2                  | ADH1A                  | DNMT3B               | E2F1                 |
| GSTT1                | FBN2                 | ADH1B                  | ECE1                 | EGFR                 |
| CXCR1                | NLRP3                | ADH4                   | NUP62                | ALB                  |
| IL5                  | NOTCH1               | CSF2                   | GAPDH                | F2                   |
| CXCL10               | CD28                 | CYP1A2                 | GC                   | ALDH1A1              |
| MIF                  | MMP3                 | CYP17A1                | GCG                  | FGFR4                |
| HLA-C                | CDKN2A               | AHCY                   | SLC17A5              | TPX2                 |
| IL1RN                | LOC102724197         | F2                     | NXT1                 | TBC1D9               |
| KIR3DL1              | GGTLC1               | ALDH1A1                | GTF2H1               | SULF1                |
| LGALS9               | FGF19                | ALDH1B1                | HGF                  | MTOR                 |
| IFNB1                | GPT                  | B3GAT1                 | HLA-B                | G6PD                 |
| HAMP                 | LOXL2                | EIF2AK1                | HNF4A                | BBC3                 |
| ALB                  | CD14                 | LAMA1                  | APOA1                | GLI2                 |
| HAVCR2               | PTGS2                | IL3                    | ICAM1                | ABO                  |
| FAS                  | HAMP                 | MMP1                   | HCAR2                | H2AZ1                |
| DLAT                 | STAT4                | SERPINB2               | IFNA1                | HGF                  |
| CYP2D7               | SLC17A5              | ABCB4                  | IFNA13               | HIF1A                |
| MLKL                 | PYCARD               | PRF1                   | IL1B                 | HLA-A                |
| TRIM21               | CXCL8                | PRKACA                 | IL1RN                | HSPA5                |
| SH2B3                | ICAM1                | TRIB3                  | IL6                  | IFI27                |
| GATA3                | DEFB4B               | RAG2                   | IL10                 | APRT                 |
| PPIG                 | HP                   | RDX                    | IRF3                 | TICAM2               |
| TNFAIP8L2            | IL21                 | TNFRSF1B               | IRF7                 | IL2                  |
| UMOD                 | HLA-DQB1             | IKBKG                  | ITPR3                | IL6                  |
| YY1                  | FOXP3                | STC2                   | CCL4L1               | AQP9                 |
| GOLM1                | IL6                  | ALDH4A1                | UFSP1                | CD82                 |
| PDC                  | ETS1                 | SCARB1                 | MIRLET7B             | MALAT1               |
| JAM3                 | HLA-A                | GCKR                   | MIR132               | KDR                  |
| CASP1                | CEACAM5              | ATP5F1B                | MIR141               | ACAT1                |
| PDCD1LG2             | IFNG                 | NCAN                   | MIR148A              | MIRLET7B             |
| KRT20                | TLR4                 | PARVB                  | MIR182               | MIR10B               |
| CDR3                 | ARSA                 | SAMM50                 | MIR192               | MIR125A              |
| OGT                  | VDR                  | FDFT1                  | MIR21                | MIR146A              |
| CD40LG               | CASP3                | PTPRD                  | MIR29C               | MIR149               |
| CD200                | EGFR                 | ZGLP1                  | MIR30E               | MIR183               |
| ASPH                 | TLR9                 | PPARGC1A               | MIR34A               | MIR20A               |
| MS4A1                | NR1I2                | NLRP3                  | EPCAM                | MIR21                |
| NFE2L2               | PNPLA3               | OSBPL5                 | MIF                  | MIR23A               |
| OCA2                 | STS                  | COL13A1                | MIP                  | MIR29A               |

**Supplementary Table 4.** Continued

| AIH-associated genes | PSC-associated genes | MASLD-associated genes | ALC-associated genes | HCC-associated genes |
|----------------------|----------------------|------------------------|----------------------|----------------------|
| MSC                  | TNFSF10              | CRP                    | MMP7                 | MIR34A               |
| NOX4                 | MAPK3                | DPP4                   | COX2                 | MIR34B               |
| IL22                 | MIR200B              | ERBB4                  | MYC                  | MIR17HG              |
| CD1D                 | H3P10                | FBL                    | MYD88                | MAT1A                |
| IL33                 | DEFB4A               | ALB                    | ATF3                 | MCL1                 |
| TNFRSF14             | TP53                 | EHP1L1                 | NAIP                 | MFAP1                |
| CD74                 | RLN2                 | GCG                    | NM                   | MIR346               |
| TSHR                 | NEUROG3              | SLC17A5                | DCTN4                | COX2                 |
| NUDT15               | MIR483               | GGT1                   | TLR7                 | MTHFR                |
| C4A                  | KRT20                | GLP1R                  | TNFRSF12A            | OGG1                 |
| ACTA1                | POLR2G               | GPT                    | UFC1                 | PCA3                 |
| IL21                 | PPARA                | HFE                    | SIRT6                | PBX3                 |
| MAP3K7               | IL22                 | APOC3                  | UFM1                 | TMED7                |
| KLHL12               | AICDA                | IGF1                   | PMCH                 | GOLM1                |
| STXBP2               | USE1                 | IL1B                   | TLR9                 | PDGFRA               |
| STAT4                | ABCB1                | IL6                    | PPARG                | EEF1AKNMT            |
| RORC                 | RETN                 | KRT18                  | PRNP                 | PDK4                 |
| RPS20                | PIK3CD               | LEPR                   | PTX3                 | ENPP2                |
| SLC2A3               | ADGRB3               | LIPA                   | RELA                 | RTEL1                |
| S100B                | PSG2                 | MIR122                 | MIR483               | PGF                  |
| CXCL12               | PDZK1                | MIR21                  | S100A4               | ABCB1                |
| IL25                 | MAPK1                | MIR34A                 | CCL3                 | SERPINA1             |
| TRBV20OR9-2          | BCL2                 | MTTP                   | CXCL11               | ATR                  |
| PTPRC                | WDR11                | PIK3CA                 | CIDEA                | UGT1A7               |
| TG                   | BCL2L1               | PIK3CB                 | TRA2B                | UGT1A9               |
| TRAF6                | IL23A                | PIK3CD                 | GORASP1              | XAF1                 |
| NR2C2                | BCL3                 | PIK3CG                 | WNK1                 | ASAP3                |
| RNPC3                | HLA-DPB1             | PPARG                  | SMPD1                | URGCP                |
| WDR11                | TM6SF2               | GATAD2A                | SPP1                 | PSMD9                |
| MYDGF                | CUZD1                | PRKAA1                 | SYT1                 | PTGS2                |
| TPO                  | S100A8               | PRKAA2                 | ADAM17               | MIR490               |
| KLHL1                | S100A12              | PRKAB1                 | TCF4                 | PYCR1                |
| TNFAIP3              | CFLAR                | RBP4                   | TGFB1                | CCND1                |
| TLR3                 | TNFRSF25             | SCD                    | TLR2                 | BCL2                 |
| TLR2                 | SOCS1                | SHBG                   | TLR3                 | ALX4                 |
| TGFB1                | ABCB11               | SLC5A2                 | TNFRSF1A             | GAS5                 |
| S100A1               | AOC3                 | GGTLC5P                | TP53                 | SERPINB3             |
| HHIP                 | RSPO3                | SP4                    | POTEF                | SERPINB4             |
| ARSA                 | SARNP                | SREBF2                 | UCP2                 | CCL2                 |
| ADA                  | JAM3                 | TLR4                   | CXCR4                | NCAPG                |
| KLF14                | ARID1A               | TNF                    | TFEB                 | BLVRA                |

**Supplementary Table 4.** Continued

| AIH-associated genes | PSC-associated genes | MASLD-associated genes | ALC-associated genes | HCC-associated genes |
|----------------------|----------------------|------------------------|----------------------|----------------------|
| CRP                  | GATD3A               | GGTLC3                 | GSDMD                | ST6GAL1              |
| IL34                 | HSPB3                | GGT2                   | CAV1                 | SOX1                 |
| CYP2B6               | NOL3                 | GGTLC4P                | IL18R1               | SOX2                 |
| CYP2C19              | KMT2B                | CNBP                   | SQSTM1               | STIM1                |
| CYP2C9               | CD68                 | MBOAT7                 | CD14                 | TAGLN                |
| CYP2E1               | CD47                 | EHMT1                  | CCL4L2               | BTG1                 |
| CYP3A4               | CD40LG               | ACTR5                  | CD69                 | TGFB1                |
| DCK                  | PTGES                | ZNF512                 | CD74                 | HULC                 |
| DNASE1               | ENTPD1               | CRACR2A                | CDK1                 | CCR2                 |
| ATN1                 | GRAP2                | PLPP7                  | FGF19                | VCAM1                |
| PGAM5                | MS4A1                | PWWP3A                 | CYP2E1               | VHL                  |
| FBL                  | DLG5                 | TP63                   | SOD2                 | XRCC1                |
| FANCC                | XPR1                 | DDX60L                 | MPO                  | DEK                  |
| KLRK1                | MADCAM1              | XPR1                   | TM6SF2               | SUV39H2              |
| SLCO6A1              | AGBL2                | CD36                   | MBOAT7               | TFPI2                |
| IL17RE               | SPTBN1               | CREB5                  | CAT                  | TET1                 |
| TEC                  | SPP1                 | FGF19                  | MIR885               | PNPLA3               |
| SYCE1L               | SOD2                 | AHSG                   | MIR3615              | ENC1                 |
| CD24                 | SLC10A2              | FASN                   | COL3A1               | RUNX3                |
| KLRC4-KLRK1          | UBE2Z                | GABPA                  | MIR17                | TNKS                 |
| ABCC4                | NOD2                 | GH1                    | MIR93                | EIF3I                |
| TNIP1                | SDC1                 | LBP                    | SMAD3                | PROM1                |
| FGL2                 | CCL25                | LGALS3BP               | MMP2                 | MTG1                 |
| BTG3                 | CCL21                | HAMP                   | MIR338               | SLC9A3R1             |
| RIPK3                | CCL20                | REN                    | MIR423               | KIF20B               |
| CHRNA4               | SRY                  | NR1H3                  | MIR193B              | CD151                |
| NLRP3                | SLC9A3R1             | CYP3A4                 | BCL2                 | FGF19                |
| FCRL3                | NEIL1                | FABP1                  | MIR484               | MET                  |
| CCR3                 | AIMP2                | SIRT3                  | MIR421               | SLC22A18             |
| CCR7                 | VIM                  | HNF4A                  | MIR532               | ALDOB                |
| ABCC2                | TXNRD1               | HSD17B13               | MIR589               | APC                  |
| MPRIP                | TXN                  | IL17A                  | MIR629               | BTRC                 |
| SMUG1                | CCR2                 | MLXIPL                 | TIMP1                | CABIN1               |
| GABPA                | C3                   | CCL2                   | MMP13                | CD34                 |
| IFNA2                | TFF3                 | LOC102724197           | PLAU                 | CD80                 |
| IFNA13               | TERC                 | AGTR1                  | PPP1R16B             | CD81                 |
| IL1A                 | SULT2A1              | MTOR                   | SUGP1                | CDKN1B               |
| FASLG                | CFB                  | FETUB                  | ADH1B                | CXCL10               |
| IL4R                 | PAEP                 | APOE                   | ADH1C                | FGL1                 |
| IL7R                 | RNF19A               | PON1                   | ALDH2                | GRAP2                |
| CXCL8                | ABCD1                | RETN                   | AKR1A1               | GSTM1                |

**Supplementary Table 4.** Continued

| AIH-associated genes | PSC-associated genes | MASLD-associated genes | ALC-associated genes | HCC-associated genes |
|----------------------|----------------------|------------------------|----------------------|----------------------|
| IL13                 | FBL                  | RARRES2                | GSTM1                | HLA-DPB1             |
| IDO1                 | AKT1                 | UCP2                   | NAT2                 | HLA-DQA1             |
| INS                  | ERBB2                | NR0B2                  | GPC3                 | HLA-DQB1             |
| INPP5D               | ELK1                 | GGTLC1                 | CXCL1                | HLA-DRB1             |
| GSTK1                | JAG1                 | DECRI                  | GSTP1                | IFNAR1               |
| KIR2DS1              | SLC26A3              | PCSK9                  | HLA-A                | IFNAR2               |
| C6orf120             | DNASE1               | ACACA                  | APOE                 | IL12RB1              |
| MIR143               | AGA                  | HMGB1                  | AVP                  | IL18                 |
| IFNA1                | AFP                  | APOB                   | STAT3                | IL18R1               |
| HSPD1                | F3                   | IL10                   | PSC                  | IL1B                 |
| GATA2                | PTK2B                | LPL                    | CALCOCO2             | IL2RB                |
| GCG                  | KLRK1                | MIR192                 | PIAS3                | IL4                  |
| SLC17A5              | TXN2                 | MTHFR                  | CEL                  | LTBP2                |
| IL37                 | GABPA                | SERPINE1               | RIPK3                | MASP2                |
| IL17C                | FUT3                 | ANGPTL8                | CHI3L1               | MBL2                 |
| GLI2                 | ABCA4                | SOD1                   | ADH4                 | MT1X                 |
| GPR39                | KCNH4                | TP53                   | ADH5                 | MX1                  |
| NR3C1                | WWC1                 | VDR                    | NCAN                 | NFKB1                |
| GSTM1                | TBC1D9               | IRS2                   | CSTB                 | PLA2G12B             |
| GSTM2                | FOXO3                | TRIB1                  | CTLA4                | PTK2                 |
| CARD10               | FOXO1                | TXNIP                  | CTNNB1               | RB1                  |
| ICOS                 | PDZD2                | PLIN2                  | CYBB                 | SPARC                |
| HK1                  | DEFB1                | CNR1                   | CYP1A1               | STAT3                |
| HLA-B                | DDC                  | CYBB                   | CYP2C19              | STAT5A               |
| HRAS                 | DCT                  | AKT1                   | CYP4A11              | TERF1                |
| MIR155               | BTG3                 | ABCD1                  | ACE                  | TERF2                |
|                      | CEACAM7              | FOXO1                  | NQO1                 | UGT1A6               |
|                      | CEACAM3              | GOLGA6A                | AFM                  |                      |
|                      | CCR9                 | APRT                   | ENG                  |                      |
|                      | MTCO2P12             | IRS1                   | GABPA                |                      |
|                      | TXNIP                | MIR33A                 | GABRG2               |                      |
|                      | AHSA1                | MFAP1                  | GGT1                 |                      |
|                      | NOD1                 | NR3C2                  | GLUL                 |                      |
|                      | GATD3B               | SERPINA1               | GPT                  |                      |
|                      | KLRC4-KLRK1          | RCBTB1                 | GPX1                 |                      |
|                      | CHRM3                | PNPLA2                 | GRB2                 |                      |
|                      | KIF12                | SELENOP                | GSTT1                |                      |
|                      | MGLL                 | SOD2                   | HFE                  |                      |
|                      | CX3CR1               | STAT3                  | IFNG                 |                      |
|                      | CTNNB1               | PPP1R3B                | ARSH                 |                      |
|                      | CTLA4                | NR112                  | FAS                  |                      |

**Supplementary Table 4.** Continued

| AIH-associated genes | PSC-associated genes | MASLD-associated genes | ALC-associated genes | HCC-associated genes |
|----------------------|----------------------|------------------------|----------------------|----------------------|
|                      | CCBE1                | FADS2                  | IL2                  |                      |
|                      | MAPK14               |                        | INSRR                |                      |
|                      | HT                   |                        | ENHO                 |                      |
|                      | DEFB104A             |                        | ARG1                 |                      |
|                      | CRK                  |                        | LMNA                 |                      |
|                      | KCNH8                |                        | MAT1A                |                      |
|                      | CTHRC1               |                        | MDM2                 |                      |
|                      | PBC2                 |                        | MTHFR                |                      |
|                      | DEFB104B             |                        | NFE2L2               |                      |
|                      | KMT2A                |                        | NFKB1                |                      |
|                      | MICB                 |                        | NOS3                 |                      |
|                      | MEN1                 |                        | SERPINA1             |                      |
|                      | MEFV                 |                        | SPHK2                |                      |
|                      | MCL1                 |                        | RARRES2              |                      |
|                      | MIR222               |                        | RASGRF2              |                      |
|                      | MIR21                |                        | SERPINB3             |                      |
|                      | MIR200C              |                        | SERPINB4             |                      |
|                      | MIR150               |                        | SELE                 |                      |
|                      | MIR122               |                        | SLC1A2               |                      |
|                      | MME                  |                        | GGTLC5P              |                      |
|                      | MMP1                 |                        | GGTLC3               |                      |
|                      | MMP2                 |                        | GGT2                 |                      |
|                      | ORM2                 |                        | GGTLC4P              |                      |
|                      | DDR2                 |                        | VDR                  |                      |
|                      | NRAS                 |                        | XRCC1                |                      |
|                      | NOTCH3               |                        | ST8SIA4              |                      |
|                      | NFE2L2               |                        | MSC                  |                      |
|                      | NCAM1                |                        | GDF15                |                      |
|                      | COX2                 |                        | F2                   |                      |
|                      | MPO                  |                        | GOT1                 |                      |
|                      | MMP14                |                        | GOT2                 |                      |
|                      | MMP9                 |                        | PPP1R12A             |                      |
|                      | LSS                  |                        | NOSIP                |                      |
|                      | LGALS3BP             |                        | UBA5                 |                      |
|                      | AREG                 |                        | UBA6                 |                      |
|                      | HLA-DOA              |                        | KRT18                |                      |
|                      | HCLS1                |                        | CD79A                |                      |
|                      | ANXA2                |                        | LBP                  |                      |
|                      | ICOS                 |                        | ALPPL2               |                      |
|                      | GSTT1                |                        | ALPP                 |                      |
|                      | CD274                |                        | ALPL                 |                      |

**Supplementary Table 4.** Continued

| AIH-associated genes | PSC-associated genes | MASLD-associated genes | ALC-associated genes | HCC-associated genes |
|----------------------|----------------------|------------------------|----------------------|----------------------|
|                      | NR3C1                |                        | ASPH                 |                      |
|                      | GCLM                 |                        | GOT1L1               |                      |
|                      | GCLC                 |                        | MDFI                 |                      |
|                      | B3GAT1               |                        | SRSF4                |                      |
|                      | HLA-DRB5             |                        | ALLC                 |                      |
|                      | AIRE                 |                        | KRT8                 |                      |
|                      | HES1                 |                        | TF                   |                      |
|                      | ISG20                |                        | ALG10                |                      |
|                      | INSRR                |                        | MARS                 |                      |
|                      | IL17A                |                        | CRP                  |                      |
|                      | IL15                 |                        | ALDH1B1              |                      |
|                      | IL13                 |                        | GLUD2                |                      |
|                      | IL12A                |                        | IL3RA                |                      |
|                      | IL1RN                |                        | AASS                 |                      |
|                      | IL1B                 |                        | ADAMTS13             |                      |
|                      | IL1A                 |                        | FAF1                 |                      |
|                      | NANOS2               |                        | ADGRL4               |                      |
|                      | POLDIP2              |                        | EHMT1                |                      |
|                      |                      |                        | ALDOC                |                      |
|                      |                      |                        | GPT2                 |                      |
|                      |                      |                        | INS                  |                      |
|                      |                      |                        | TNFRSF1B             |                      |
|                      |                      |                        | DGAT2                |                      |
|                      |                      |                        | TSC22D3              |                      |
|                      |                      |                        | BIN2                 |                      |
|                      |                      |                        | LMNB2                |                      |
|                      |                      |                        | APOA2                |                      |
|                      |                      |                        | MAPK10               |                      |
|                      |                      |                        | DECR1                |                      |
|                      |                      |                        | AFP                  |                      |
|                      |                      |                        | BCHE                 |                      |
|                      |                      |                        | RAF1                 |                      |
|                      |                      |                        | FASLG                |                      |
|                      |                      |                        | GPX5                 |                      |
|                      |                      |                        | GPX4                 |                      |
|                      |                      |                        | ALDOB                |                      |
|                      |                      |                        | TTR                  |                      |
|                      |                      |                        | CD4                  |                      |
|                      |                      |                        | SMTN                 |                      |
|                      |                      |                        | PPCS                 |                      |
|                      |                      |                        | ALDOA                |                      |

**Supplementary Table 4.** Continued

| AIH-associated genes | PSC-associated genes | MASLD-associated genes | ALC-associated genes | HCC-associated genes |
|----------------------|----------------------|------------------------|----------------------|----------------------|
|                      |                      |                        | THEM5                |                      |
|                      |                      |                        | LARS                 |                      |
|                      |                      |                        | PRMT1                |                      |
|                      |                      |                        | HP                   |                      |
|                      |                      |                        | ABCB4                |                      |
|                      |                      |                        | CCL20                |                      |
|                      |                      |                        | LPIN1                |                      |
|                      |                      |                        | HPR                  |                      |
|                      |                      |                        | ADCY8                |                      |
|                      |                      |                        | HVCN1                |                      |
|                      |                      |                        | PDE4B                |                      |
|                      |                      |                        | CXCL6                |                      |
|                      |                      |                        | IL1R2                |                      |
|                      |                      |                        | CHPF                 |                      |
|                      |                      |                        | RAP1A                |                      |
|                      |                      |                        | IL18BP               |                      |
|                      |                      |                        | ALDH3A2              |                      |
|                      |                      |                        | CARD17               |                      |
|                      |                      |                        | GRB7                 |                      |
|                      |                      |                        | GLUD1                |                      |
|                      |                      |                        | CUL3                 |                      |
|                      |                      |                        | CCL1                 |                      |
|                      |                      |                        | AMFR                 |                      |
|                      |                      |                        | LIFR                 |                      |
|                      |                      |                        | FUT4                 |                      |
|                      |                      |                        | MAVS                 |                      |
|                      |                      |                        | GSTA3                |                      |
|                      |                      |                        | TP53INP1             |                      |
|                      |                      |                        | GSTA2                |                      |
|                      |                      |                        | DNTT                 |                      |
|                      |                      |                        | GSTA4                |                      |
|                      |                      |                        | GSTA1                |                      |
|                      |                      |                        | SMPD2                |                      |
|                      |                      |                        | F5                   |                      |
|                      |                      |                        | CD163                |                      |
